# Immunoadjuvant Prednisolone Therapy for HIV-Associated Tuberculosis: A Phase 2 Clinical Trial in Uganda

Harriet Mayanja-Kizza,<sup>1</sup> Edward Jones-Lopez,<sup>3</sup> Alphonse Okwera,<sup>2</sup> Robert S. Wallis,<sup>3</sup> Jerrold J. Ellner,<sup>3</sup> Roy D. Mugerwa,<sup>1</sup> and Christopher C. Whalen,<sup>4</sup> for the Uganda–Case Western Research Collaboration

<sup>1</sup>Department of Medicine, Makerere University Medical School, and <sup>2</sup>Uganda National Tuberculosis and Leprosy Control Programme, Kampala, Uganda; <sup>3</sup>Department of Medicine, University of Medicine and Dentistry of New Jersey, Newark; <sup>4</sup>Department of Epidemiology and Biostatistics, Case Western Reserve University, Cleveland, Ohio

**Background.** Human immunodeficiency virus (HIV)–infected patients with tuberculosis (TB) respond to effective antituberculous therapy, but their prognosis remains poor. Mounting evidence from clinical studies supports the concept of copathogenesis in which immune activation that is triggered by TB and mediated by cytokines stimulates viral replication and worsens HIV infection, especially when immune function is preserved.

**Methods.** We performed a phase 2, randomized, double-blind, placebo-controlled clinical trial in Kampala, Uganda, to determine whether immunoadjuvant prednisolone therapy in HIV-infected patients with TB who have CD4<sup>+</sup> T cell counts  $\geq 200$  cells/ $\mu$ L is safe and effective at increasing CD4<sup>+</sup> T cell counts.

**Results.** Short-term prednisolone therapy reduced levels of immune activation and tended to produce higher CD4<sup>+</sup> T cell counts. Although prednisolone therapy was associated with a more rapid clearance of *Mycobacterium tuberculosis* from the sputum, it was also associated with a transient increase in HIV RNA levels, which receded when prednisolone therapy was discontinued. The intervention worsened underlying hypertension and caused fluid retention and hyperglycemia.

**Conclusion.** The benefits of prednisolone therapy on immune activation and CD4<sup>+</sup> T cell counts do not outweigh the risks of adverse events in HIV-infected patients with TB and preserved immune function.

Tuberculosis (TB) is a common and serious complication of HIV-1 infection in the developing world, especially in sub-Saharan Africa [1]. Since the emergence of the HIV epidemic in Africa, the incidence rates of TB have increased dramatically, overwhelming national TB control programs across Africa. More than one-half of patients with TB presenting to TB clinics are infected with HIV, and these patients often present at early stages of HIV infection.

Although HIV-infected patients with TB respond to

effective antituberculous therapy [2–4], their prognosis remains poor [3, 5–8]. Deaths early during treatment are often attributable to TB [3, 6], whereas deaths late during treatment are attributable to complications of HIV infections other than TB. Epidemiologic observations indicate that TB may increase the rate of opportunistic infections in HIV-infected patients [9, 10] and may reduce survival [9, 11, 12], especially among patients with CD4<sup>+</sup> T cell counts  $\geq 200$  cells/ $\mu$ L [13, 14]. Mounting evidence from immunologic and virologic studies supports the concept of copathogenesis in which TB triggers cellular immune activation [15, 16], mediated by cytokines such as tumor necrosis factor (TNF)– $\alpha$ , which, in turn, stimulates HIV replication, leading to higher viral load and accelerating HIV infection.

One point of attack in efforts to stop this cascade is to attenuate expression of cytokines and thereby reduce the stimulus for HIV replication in latently infected cells [17]. Phase 1 and 2 clinical trials of selective TNF– $\alpha$  inhibitors—such as thalidomide, pentoxifylline, and etanercept—in HIV-associated TB have shown that these

Received 7 July 2004; accepted 23 September 2004; electronically published 8 February 2005.

Presented in part: annual meeting of the Infectious Diseases Society of America, San Francisco, 25–28 October 2001 (abstract 200834).

Financial support: National Institutes of Health, Division of AIDS (grant AI32414); Fogarty International Center (grant TW00011); Center for AIDS Research at Case Western Reserve University (grant AI36219).

Reprints or correspondence: Dr. Christopher Whalen, Dept. of Epidemiology and Biostatistics, WG-37, Case Western Reserve University School of Medicine, 10900 Euclid Ave., Cleveland, OH 44106-4945 (ccw@case.edu).

The Journal of Infectious Diseases 2005;191:856–65

© 2005 by the Infectious Diseases Society of America. All rights reserved. 0022-1899/2005/19106-0005\$15.00

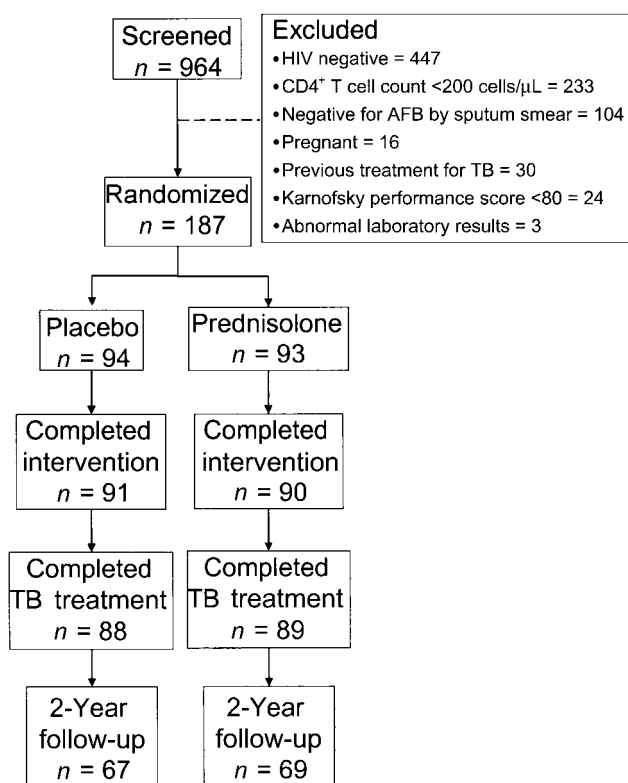

**Figure 1.** Study flow profile. AFB, acid-fast bacilli; TB, tuberculosis.

inhibitors offer short-term clinical benefits and reduce viral load despite only partial inhibition of TNF- $\alpha$  [18–20]. Since the immune activation of TB is mediated through a network of cytokines, less selective and more potent agents, such as glucocorticoids, may be more effective at interrupting the effects of TB on HIV than are selective cytokine inhibitors. In an observational study of HIV-infected patients without AIDS, the use of corticosteroids was associated with sustained increases in CD4<sup>+</sup> T cell counts, with a minimum of adverse events [21, 22].

Prednisolone is an attractive choice for immunoadjuvant therapy in HIV-associated TB because it reduces expression of cytokines [23, 24], is effective in managing inflammatory complications of extrapulmonary TB [25], and is an inexpensive and widely available glucocorticoid agent. Like all corticosteroids, however, prednisolone can produce serious adverse events that may limit its use, even if shown to be effective. The balance of benefit and risk for prednisolone therapy has not been established for patients with HIV-associated TB. The aim of the present study was to assess the safety and biological effect of oral, self-administered prednisolone therapy as an immunoadjuvant treatment for HIV-associated TB among patients with CD4<sup>+</sup> T cell counts  $\geq 200$  cells/ $\mu$ L.

## SUBJECTS AND METHODS

**Study design and population.** The present study was a phase 2, randomized, double-blind, placebo-controlled clinical trial

of oral prednisolone therapy during standard treatment for HIV-associated pulmonary TB. The study protocol was approved by the institutional review board at Case Western Reserve University and by the Ugandan AIDS Research Committee. All subjects gave informed consent for the study. In 2001, the study was reviewed by the data safety and monitoring board of the Division of AIDS, National Institutes of Health, and the decision was made to not expand the study to include mortality as the main outcome, because surrogate markers for HIV disease progression were similar between the 2 treatment arms at the end of the intervention period.

Between October 1998 and August 2000, 187 HIV-infected patients >18 years of age with initial episodes of acid fast smear-positive pulmonary TB who presented to the National Tuberculosis Program in Kampala, Uganda, were enrolled in the trial. The exclusion criteria were the following: previous treatment for TB, advanced HIV infection (World Health Organization stage IV), Karnofsky performance score <80, peripheral blood CD4<sup>+</sup> T cell count <200 cells/ $\mu$ L, Kaposi sarcoma, active herpes zoster, glucose level >160 mg/dL or diabetes mellitus by history, serum aminotransferase level >65 IU/L, potassium level >5.5 mmol/L, positive  $\beta$ -urinary human chorionic gonadotrophin test, previous use of immunomodulators, presence or history of hypertension, psychiatric disease, peptic ulcer disease, or pancreatitis.

**Intervention and randomization.** A phase 1 clinical trial of 30 HIV-infected patients with TB was performed to determine the weight-adjusted dose of prednisolone required to reduce expression of TNF- $\alpha$  by 50%, as measured in whole-blood cultures stimulated with culture filtrate of *Mycobacterium tuberculosis*. In a pilot pharmacokinetic study, we determined the oral bioavailability of prednisolone to be 51% and that a daily dose of 2.75 mg/kg prednisolone was needed to achieve a 50% reduction in expression of TNF- $\alpha$ . The intervention consisted of prednisolone tablets (Berk Pharmaceuticals) given at a dose of 2.75 mg/kg daily for 4 weeks and tapered over the course of the next 4 weeks to complete an 8-week course. Placebo was an inactive, inert tablet manufactured to be identical in appearance to the active prednisolone tablets. Placebo tablets were given in the same quantity as were prednisolone tablets, within the same weight category. All patients were treated with standard treatment for TB, which consisted of weight-adjusted doses of isoniazid, rifampin, pyrazinamide, and ethambutol [26].

Eligible patients were randomly assigned in blocks of 6 to receive either prednisolone or placebo. The randomization schedule was developed before the trial by use of computer-generated random numbers with corresponding treatment assignments. These assignments were placed in sealed envelopes and drawn sequentially by a study nurse who was not involved with patient care. The clinic dispensary supplied prelabeled drug packs according to assigned treatment and gave instructions for proper dosing and health education. Medications were

**Table 1. Baseline clinical and demographic characteristics, by treatment arm.**

| Characteristic                                     | Placebo<br>(n = 94) | Prednisolone<br>(n = 93) |
|----------------------------------------------------|---------------------|--------------------------|
| Men, no. (%) of patients                           | 58 (62)             | 55 (59)                  |
| BCG scar present, no. (%) of patients              | 42 (46)             | 40 (44)                  |
| PPD induration $\geq 5$ mm, no. (%) of patients    | 79 (84)             | 83 (89)                  |
| Karnofsky performance status, no. (%) of patients  |                     |                          |
| 90                                                 | 21 (22)             | 28 (30)                  |
| 80                                                 | 68 (72)             | 60 (65)                  |
| 70                                                 | 5 (5)               | 5 (5)                    |
| Age, mean (SD), years                              | 31 (7.2)            | 31 (7.1)                 |
| Body mass index, mean (SD), kg/m <sup>2</sup>      | 19 (2.6)            | 19 (2.8)                 |
| Hemoglobin level, mean (SD), g/dL                  | 11 (1.8)            | 11 (1.8)                 |
| WBC count, mean (SD), cells/mm <sup>3</sup>        | 7.8<br>(2.8)        | 8.0 (2.8)                |
| Lymphocyte count, mean (SD), cells/mm <sup>3</sup> | 2.0<br>(0.9)        | 1.9 (0.8)                |
| AST level, mean (SD), IU/L                         | 24 (12)             | 26 (12)                  |
| Glucose level, mean (SD), mg/dL                    | 88 (24)             | 85 (24)                  |
| Potassium level, mean (SD), mmol/dL                | 4.8<br>(0.5)        | 4.7 (0.4)                |
| PPD induration, mean (SD), mm                      | 15 (6.4)            | 16 (5.4)                 |
| Symptoms, no. (%) of patients                      |                     |                          |
| Cough                                              | 94 (100)            | 93 (100)                 |
| Chest pain                                         | 55 (59)             | 53 (57)                  |
| Hemoptysis                                         | 11 (12)             | 5 (5)                    |
| Dyspnea                                            | 31 (33)             | 36 (40)                  |
| Fever <sup>a</sup>                                 | 46 (49)             | 62 (67)                  |
| Weight loss                                        | 76 (81)             | 78 (84)                  |
| Purulent sputum                                    | 81 (86)             | 76 (82)                  |
| Night sweats <sup>a</sup>                          | 50 (53)             | 60 (65)                  |
| Physical examination, no. (%) of patients          |                     |                          |
| Respiratory                                        |                     |                          |
| Consolidation                                      | 93 (99)             | 90 (97)                  |
| Wheezing or rhonchi                                | 1 (1)               | 2 (2)                    |
| Pleural effusion                                   | 1 (1)               | 0                        |
| Lymph node enlargement                             | 4 (4)               | 6 (6)                    |
| Sputum smear                                       |                     |                          |
| Scanty                                             | 7 (7)               | 7 (8)                    |
| 1                                                  | 17 (18)             | 22 (24)                  |
| 2                                                  | 26 (28)             | 13 (14)                  |
| 3                                                  | 44 (47)             | 49 (54)                  |
| Cavitary                                           | 74 (79)             | 80 (86)                  |
| Chest radiograph finding                           |                     |                          |
| Normal                                             | 0                   | 2 (1)                    |
| Minimal                                            | 4 (4)               | 3 (3)                    |
| Moderately advanced                                | 25 (27)             | 23 (25)                  |
| Far advanced                                       | 65 (69)             | 66 (71)                  |

**NOTE.** AST, aspartate aminotransferase; BCG, Bacille Calmette-Guérin; PPD, purified protein derivative; WBC, white blood cell.

<sup>a</sup>  $P < .05$ ,  $\chi^2$  test.

self-administered, and adherence was monitored by self-report, pill count, and urinary isoniazid metabolite testing (DynaGen).

**Assessment of outcome.** The main study outcomes were the safety of prednisolone therapy and the effect of prednisolone therapy on CD4<sup>+</sup> T cell counts and HIV RNA levels during treatment for HIV-associated pulmonary TB. The safety of

prednisolone therapy was assessed by mortality and the incidence rate of grade 3 or 4 adverse events, as defined by standard toxicity tables used by the AIDS Clinical Trials Group. Deaths occurring within 1 year of the intervention were reviewed by 2 of the authors, to determine the relation to the study intervention; deaths occurring after 1 year were considered unlikely

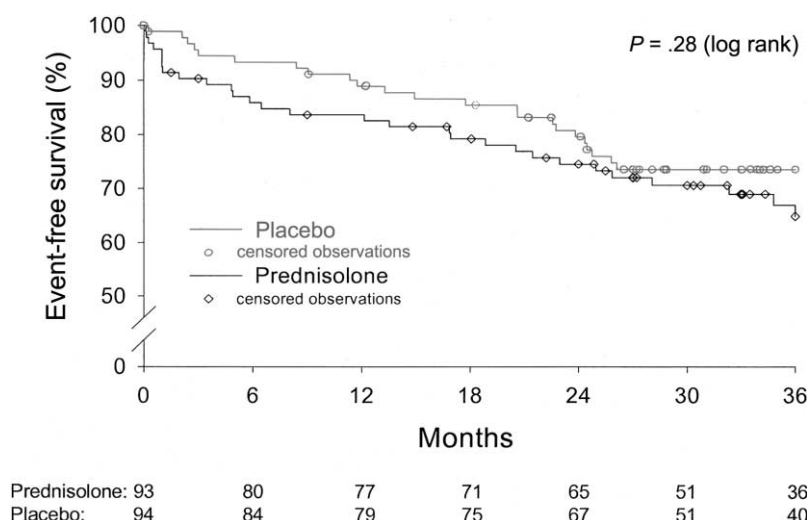

**Figure 2.** Event-free survival to first grade 3 or 4 adverse event or death in the prednisolone arm (dark line) and the placebo arm (light line)

to be affected by the study intervention. Serum TNF- $\alpha$  (Medgenix; BioSource), serum TNF- $\alpha$  type II receptor (TNF- $\alpha$ RII; Medgenix; BioSource), *M. tuberculosis* culture filtrate-induced TNF- $\alpha$  (TNF- $\alpha$ -CF; R&D Systems), and serum neopterin (ICN) were used to measure immune activation at baseline and 1 and 4 months. To evaluate the effects of prednisolone therapy on the response to antituberculous therapy, sputum samples obtained at 1 and 2 months were examined for clearance of microorganisms. Treatment failure was defined as the failure to clear acid-fast bacilli (AFB) from the sputum after 5 consecutive months of antituberculous therapy to which the organism was susceptible. TB relapse was defined as the recurrence of active TB after the establishment of cure.

**Follow-up and measurements.** Study patients in both treatment arms were seen weekly during the first month, twice during the second month, monthly up to 6 months, and quarterly thereafter. Home visitors contacted subjects who missed scheduled appointments and encouraged them to return to the clinic.

Demographic and clinical information was obtained through standardized interviews and physical examinations performed by medical officers. At the time of screening, chest radiographs and sputum smears for AFB (by the Ziehl-Neelsen method) were performed. Blood was collected for HIV testing, complete blood and differential counts (Coulter T540 system), CD4<sup>+</sup> T cell counts (EPICS Profile 2 Flow Cytometry), and determination of glucose, potassium, and liver enzyme levels. A urine pregnancy test ( $\beta$ -HCG) was performed for women. Quantitative plasma HIV RNA levels were determined (Cambridge BioScience) and whole-blood cytokine assays were performed at baseline and 1 and 4 months. CD4<sup>+</sup> T cell counts were determined at baseline and 1, 2, and 6 months. Sputum samples were collected at baseline, monthly until 6 months, and then at every visit thereafter. Sputum samples were concentrated and

stained for AFB at the Uganda Tuberculosis Investigations Bacteriologic Unit in Wandegaya. Sputum smears were graded according to the number of acid-fast organisms seen by light microscopy. Samples were cultured for *M. tuberculosis* on Lowenstein-Jensen medium by use of standard methods. Postero-anterior chest radiography was performed at baseline and 2, 6, and 18 months and was graded [27] by reviewers blinded to treatment assignment.

**Statistical analysis.** Cumulative incidence (95% confidence interval) was estimated as the number of events per population at risk, at baseline. Distributions of time to first event were summarized by use of the Kaplan-Meier method [28] and were compared between treatment arms by use of the log rank test [29]. The safety of corticosteroids was determined by comparing the cumulative proportion of grade 3 or 4 adverse events between treatment arms by use of the  $\chi^2$  or Fisher's exact test. Means for CD4<sup>+</sup> T cell counts and HIV RNA levels were compared by use of the Student's *t* test or mixed effects linear regression models [30]. The response to antituberculous therapy was evaluated by comparing the treatment-failure and disease-recurrence rates and the proportion of subjects in each treatment arm with negative smears or cultures at 1 and 2 months.

## RESULTS

Between October 1998 and August 2000, 964 patients were screened for entrance into the study, of whom 202 were considered to eligible for the study (figure 1). Screened patients ( $n = 762$ ) were excluded for 1 or more of the following reasons: HIV negativity ( $n = 447$ ), CD4<sup>+</sup> T cell count  $<200$  cells/ $\mu$ L ( $n = 233$ ), AFB-negative sputum smear ( $n = 104$ ), previous treatment for TB ( $n = 30$ ), Karnofsky performance score  $<80$  ( $n = 24$ ), and pregnancy ( $n = 16$ ). Of the 202 patients with TB

**Table 2. Highest grade experienced for selected adverse events in patients, by treatment arm.**

| Adverse event, grade     | Placebo<br>(n = 94) | Prednisolone<br>(n = 93) | P     |
|--------------------------|---------------------|--------------------------|-------|
| Candidiasis, moderate    | 34 (36)             | 30 (32)                  | .036  |
| Hyperglycemia            |                     |                          |       |
| Mild                     | 1 (1)               | 0                        |       |
| Moderate                 | 2 (2)               | 5 (5)                    |       |
| Severe                   | 0                   | 4 (4)                    | .47   |
| Abdominal pain           |                     |                          |       |
| Mild                     | 0                   | 1 (1)                    |       |
| Moderate                 | 12 (13)             | 15 (16)                  |       |
| Hepatitis                |                     |                          | .09   |
| Mild                     | 2 (2)               | 6 (6)                    |       |
| Moderate                 | 1 (1)               | 5 (5)                    |       |
| Severe                   | 1 (1)               | 1 (1)                    |       |
| Life threatening         | 2 (2)               | 0                        | <.001 |
| Fluid retention          |                     |                          |       |
| Mild                     | 4 (4)               | 22 (24)                  |       |
| Moderate                 | 0                   | 3 (3)                    |       |
| Severe                   | 0                   | 1 (1)                    | .95   |
| Pruritis                 |                     |                          |       |
| Mild                     | 5 (5)               | 6 (6)                    |       |
| Moderate                 | 26 (28)             | 25 (27)                  |       |
| Herpes simplex, moderate | 4 (4)               | 9 (10)                   | .99   |
| Herpes zoster            |                     |                          |       |
| Mild                     | 1 (1)               | 0                        |       |
| Moderate                 | 15 (16)             | 14 (15)                  |       |
| Severe                   | 0                   | 1 (1)                    | .49   |
| Kaposi sarcoma           | 2 (2)               | 0                        |       |
| Pneumonia                |                     |                          |       |
| Moderate                 | 9 (10)              | 8 (9)                    |       |
| Severe                   | 4 (4)               | 6 (6)                    | .93   |
| Life threatening         | 2 (2)               | 1 (1)                    |       |
| Urinary tract infection  |                     |                          |       |
| Moderate                 | 7 (7)               | 12 (13)                  | .19   |
| Severe                   | 0                   | 1 (1)                    |       |
| Hypertension             |                     |                          |       |
| Mild                     | 2 (2)               | 9 (10)                   |       |
| Moderate                 | 1 (2)               | 1 (1)                    | .039  |
| Life threatening         | 0                   | 1 (1)                    |       |

**NOTE.** Data are no. (%) of patients, unless otherwise noted. Categories without observations were omitted from the table but included in the statistical analysis.

initially considered to be eligible for the study, 15 were confirmed to be ineligible after enrollment and were not included in the analysis, for the following reasons: TB-negative sputum smear ( $n = 5$ ), CD4<sup>+</sup> T cell count  $<200$  cells/ $\mu$ L ( $n = 4$ ), abnormal levels of liver enzymes or potassium ( $n = 3$ ), Karnofsky performance score  $<80$  ( $n = 1$ ), and HIV negativity ( $n = 2$ ). Thus, a total of 187 subjects were eligible for analysis: 93 in the prednisolone arm and 94 in the placebo arm. Of the patients in the prednisolone arm, 90 (96%) completed the study intervention, and 89 (95%) completed antituberculosis treatment and 6 months of follow-up. Of the 94 patients in the placebo

arm, 91 (94%) completed the study intervention, and 88 (95%) completed 6 months of follow-up. The median follow-up time for both treatment arms was 34 months.

The baseline clinical and demographic characteristics were similar in the 2 treatment arms, except for fever and night sweats, which were both more common in the prednisolone arm ( $P = .05$ ) (table 1). The mean age of patients was 31 years (SD, 7.2 years), with males composing 59% of the study population. Cough and consolidation were present in all patients. All patients had mycobacterial cultures growing *M. tuberculosis*, and 92% had AFB smears of grade 1–3. Most patients had advanced disease, by chest radiography, and cavitary lesions were common in both treatment arms.

During the study, 17 patients (18%) in the prednisolone arm died, compared with 14 patients (15%) in the placebo arm. The event-free survival to either a severe or life-threatening event or death did not differ between treatment arms ( $P = .28$ , log rank test) (figure 2). The overall survival distributions between the 2 treatment arms did not differ ( $P = .75$ , log rank test). Three deaths occurred during the first 90 days after enrollment, and all occurred in the prednisolone arm. One death resulted from a sickle cell crisis on study day 3, 1 death resulted from hypertensive encephalopathy on study day 35, and 1 death resulted from meningitis on study day 64. Of the 17 deaths in the prednisolone arm, 1 was classified as probably related and 2 were classified as possibly related to the study intervention.

Of the 93 patients receiving prednisolone therapy, 87 (94%) experienced  $\geq 1$  adverse event, a proportion comparable to that in the placebo arm, in which 82 patients (87%) experienced any adverse event ( $P = .38$ ,  $\chi^2$  test). During 36 months of follow-up,  $\geq 1$  severe or life-threatening event occurred in 22 patients (29.2%) receiving prednisolone therapy and 18 patients (21.2%) receiving placebo ( $P = .19$ , log rank test). Of the 31 individuals who died during the study, 12 in the prednisolone arm and 8 in the placebo arm experienced serious adverse events that preceded death. Of the adverse events related to prednisolone therapy, hyperglycemia, fluid retention, and hypertension were significantly more common in the prednisolone arm than in the placebo arm (table 2). When hyperglycemia occurred it tended to be moderate to severe. For fluid retention and hypertension, excess cases occurred in the mild category.

At baseline, the median levels of TNF- $\alpha$ -CF, serum TNF- $\alpha$ , TNF- $\alpha$ RII, and neopterin did not differ between treatment arms (table 3). When evaluating changes in immune activation within individuals, the level of TNF- $\alpha$ -CF decreased at 1 month in the prednisolone arm, whereas it remained unchanged in the placebo arm, but, by 4 months, the differences between treatment arms had resolved (figure 3A). The other markers of immune activation followed a similar pattern. This pattern of change was seen at the treatment-arm level—median levels of TNF- $\alpha$ -CF, serum TNF- $\alpha$ , TNF- $\alpha$ RII, and neopterin were

**Table 3. Median CD4<sup>+</sup> T cell counts, plasma HIV RNA levels, and immune activation markers, by treatment arm.**

| Measurement, time of determination            | Placebo<br>(n = 94) | Prednisolone<br>(n = 93) | P <sup>a</sup> |
|-----------------------------------------------|---------------------|--------------------------|----------------|
| TNF- $\alpha$ -CF level, pg/mL                |                     |                          |                |
| Baseline                                      | 2377 (1571–3985)    | 2343 (1531–3546)         | .77            |
| 1 Month                                       | 1944 (1274–3069)    | 692 (325–1770)           | <.001          |
| 4 Months                                      | 2154 (1430–3196)    | 1715 (1081–3003)         | .19            |
| Serum TNF- $\alpha$ level, pg/mL              |                     |                          |                |
| Baseline                                      | 56.4 (40.2–70.2)    | 54.7 (41.0–76.6)         | .91            |
| 1 Month                                       | 61.9 (37.4–89.2)    | 25.3 (17.1–38.1)         | <.001          |
| 4 Months                                      | 53.9 (37.9–85.8)    | 45.8 (32.8–72.9)         | .06            |
| TNF- $\alpha$ RII level, ng/mL                |                     |                          |                |
| Baseline                                      | 19.3 (13.4–30.8)    | 21.1 (16.2–28.7)         | .25            |
| 1 Month                                       | 17.5 (11.4–29.8)    | 10.2 (7.1–14.9)          | <.001          |
| 4 Months                                      | 16.9 (11.5–22.6)    | 19.8 (12.6–25.1)         | .16            |
| Neopterin level, ng/mL                        |                     |                          |                |
| Baseline                                      | 7.0 (4.5–10.7)      | 5.9 (4.1–10.1)           | .54            |
| 1 Month                                       | 5.6 (3.2–10.5)      | 3.7 (2.3–5.3)            | <.001          |
| 4 Months                                      | 4.7 (2.9–7.4)       | 4.0 (2.6–7.5)            | .37            |
| CD4 <sup>+</sup> T cell count, cells/ $\mu$ L |                     |                          |                |
| Baseline                                      | 354 (264–507)       | 360 (287–478)            | .76            |
| 1 Month                                       | 387 (297–572)       | 416 (261–604)            | .66            |
| 2 Months                                      | 440 (295–585)       | 417 (328–573)            | .57            |
| 6 Months                                      | 385 (292–569)       | 389 (284–568)            | .89            |
| HIV RNA level, log <sub>10</sub> copies/mL    |                     |                          |                |
| Baseline                                      | 4.9 (4.5–5.4)       | 5.0 (4.4–5.4)            | .89            |
| 1 Month                                       | 4.9 (4.4–5.4)       | 5.4 (4.9–5.7)            | <.001          |
| 4 Months                                      | 4.9 (4.3–5.4)       | 4.9 (4.2–5.4)            | .46            |

**NOTE.** Data are median (interquartile range). TNF, tumor necrosis factor; TNF- $\alpha$ -CF, culture filtrate–induced TNF- $\alpha$ ; TNF- $\alpha$ RII, TNF- $\alpha$  type II receptor.

<sup>a</sup> Wilcoxon rank sum test.

lower in the prednisolone arm than in the placebo arm at 1 month but not at 4 months (table 3). The median levels of TNF- $\alpha$ -CF, serum TNF- $\alpha$ , and TNF- $\alpha$ RII decreased by at least 50% from baseline values.

At baseline, median CD4<sup>+</sup> T cell counts and HIV RNA levels did not differ between the treatment arms (table 3). To evaluate within-individual changes for CD4<sup>+</sup> T cell counts and HIV RNA levels, for each measure, we examined the change from baseline at 1 month. The mean increase in CD4<sup>+</sup> T cell count tended to be higher in the prednisolone arm than in the placebo arm (69 vs. 17 cells/ $\mu$ L;  $P = .09$ ) (figure 3B), and the variance in the change in CD4<sup>+</sup> T cell counts was higher in the prednisolone arm (259 vs. 129 cells/ $\mu$ L;  $P < .001$ , analysis of variance). Of the patients in the prednisolone arm, 26% achieved an increase in CD4<sup>+</sup> T cell count  $\geq 200$  cells/ $\mu$ L, and 35% achieved an increase  $> 100$  cells/ $\mu$ L, compared with 10% and 18%, respectively, of the patients in the placebo arm. For HIV RNA levels, the mean increase within individuals was greater in the prednisolone arm than in the placebo arm ( $0.48 \pm 0.61$  vs.  $0.02 \pm 0.58$  log<sub>10</sub> copies/mL;  $P < .001$ ) (figure 3C). The median CD4<sup>+</sup> T cell count increased in each treatment arm but did not differ between them at 1 month; in contrast, the median HIV RNA

level was higher in the prednisolone arm than in the placebo arm ( $P < .001$ ) (table 3). At 6 months, the differences in median CD4<sup>+</sup> T cell counts had resolved, as had the differences in median HIV RNA levels.

Among patients in the placebo arm, during the first month of treatment, HIV RNA levels increased as levels of culture-filtrate induced expression of TNF increased (Pearson correlation coefficient, 0.25;  $P = .02$ ); this effect was mitigated in the prednisolone arm (Pearson correlation coefficient,  $-0.04$ ;  $P = .71$ ). HIV RNA levels also increased directly as levels of neopterin increased, in both the placebo arm (Pearson correlation coefficient, 0.25;  $P = .02$ ) and the prednisolone arm (Pearson correlation coefficient, 0.22;  $P = .04$ ). Changes in immune activation markers were not associated with changes in CD4<sup>+</sup> T cell counts, in either treatment arm.

Sputum culture conversion occurred earlier in the prednisolone arm than in the placebo arm. At 1 month, a greater proportion of patients receiving prednisolone had a negative mycobacterial culture, compared with those receiving placebo (62% vs. 37%;  $P = .001$ ). At 2 months, between the 2 treatment arms, there was no difference in the proportion of patients with negative cultures (86% vs. 85%). A similar pattern was observed

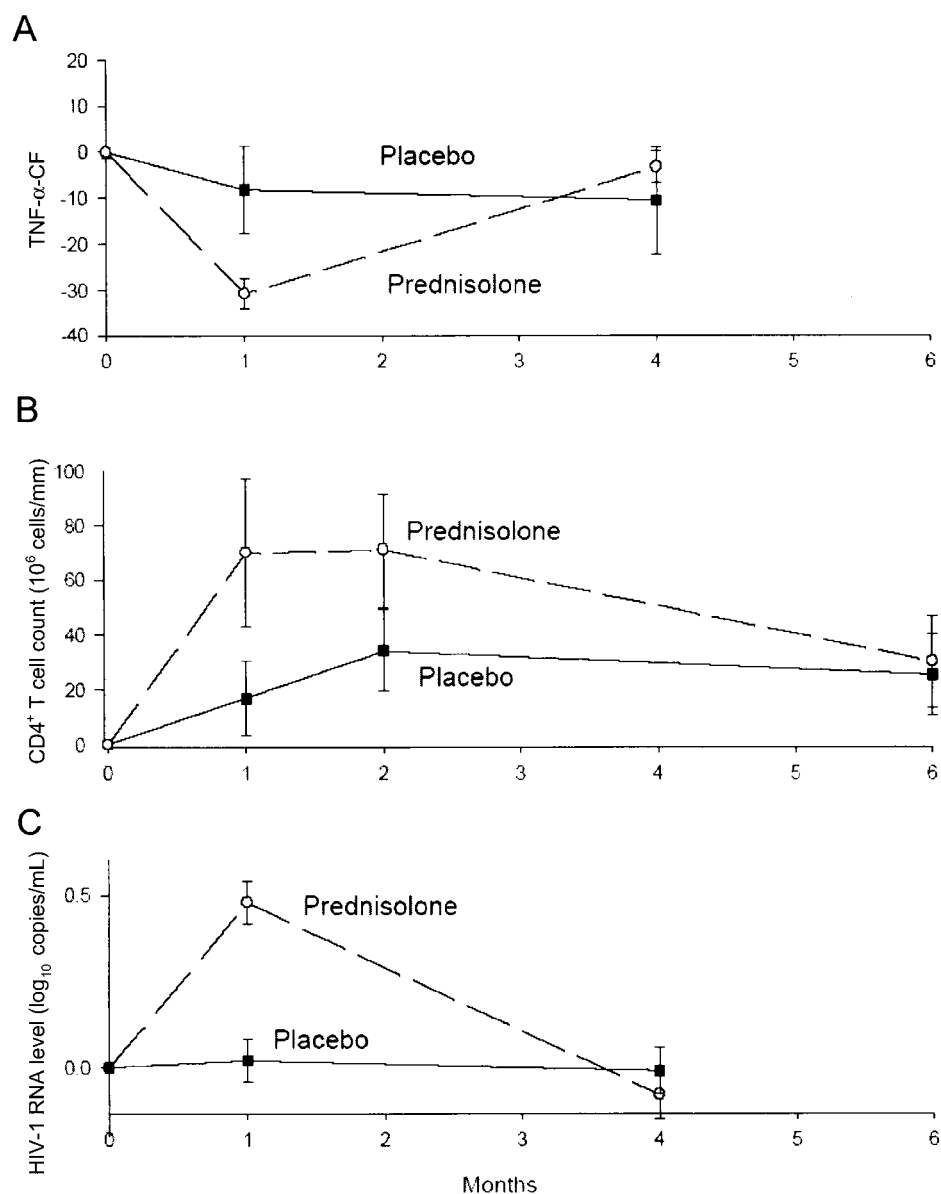

**Figure 3.** Changes in culture filtrate–induced levels of tumor necrosis factor (TNF)- $\alpha$  (A), CD4<sup>+</sup> T cell counts (B), and HIV RNA levels (C) in the prednisolone arm and the placebo arm. Error bars indicate 1 SE of the mean at each time point.

with sputum smears. Treatment failure occurred in only 2 patients (1 from each treatment arm); 1 treatment failure occurred in a patient with drug resistance to both isoniazid and rifampin. The cumulative proportion of recurrent cases within 2 years of starting treatment was similar between the prednisolone arm and the placebo arm (8.6% vs. 11.7%).

## DISCUSSION

In this phase 2, randomized, double-blind, placebo-controlled clinical trial of oral immunoadjuvant prednisolone therapy for acid fast smear–positive pulmonary TB in HIV-infected adults, we found that short-term prednisolone therapy reduced levels

of immune activation and tended to produce higher CD4<sup>+</sup> T cell counts than did placebo. Although prednisolone therapy was associated with a more rapid clearance of *M. tuberculosis* from the sputum, it was also associated with a transient increase in HIV RNA levels, which receded when prednisolone therapy was discontinued. The intervention worsened underlying hypertension and caused fluid retention and moderate to severe hyperglycemia.

The present study was based on the concept of copathogenesis in which immune activation produced by the host's response to *M. tuberculosis* may be detrimental in dually infected patients by promoting HIV replication [13, 31]. Among the

many cytokines involved in the host response to TB, TNF- $\alpha$  was used as the main marker of immune activation because it plays a central role in TB pathogenesis, granuloma formation [32], and containment of latent infection [33, 34]. Moreover, it is overexpressed in HIV-associated TB [35] and can activate cells latently infected with HIV to trigger productive infections [36–38]. Unlike previous interventions with specific TNF- $\alpha$  inhibitors, prednisolone therapy reduced levels of TNF- $\alpha$  by ~50%, compared with those in the placebo arm. Thus, the intervention achieved the desired pharmacological effect.

Despite achieving the desired effect on immune activation, prednisolone therapy did not alter the CD4<sup>+</sup> T cell response, compared with antituberculosis therapy alone. Prednisolone therapy induced an increase in CD4<sup>+</sup> T cell counts from baseline to 1 month (69 cells/ $\mu$ L), but this increase was not statistically greater than the increase observed with antituberculosis therapy alone (17 cells/ $\mu$ L). Furthermore, CD4<sup>+</sup> T cell counts returned to near baseline levels within 4 months of discontinuation of prednisolone therapy. The initial increase in CD4<sup>+</sup> T cell counts with prednisolone therapy has been observed in HIV-infected patients with pleural TB with CD4<sup>+</sup> T cell counts distributed over a wide range [39] and in asymptomatic HIV-infected patients with high CD4<sup>+</sup> T cell counts [22, 40]. Unlike these studies, in the present study, the initial increase in CD4<sup>+</sup> T cell count with prednisolone therapy was not sustained. This difference may result from differences in study populations, dose, or duration of prednisolone therapy. It is also possible that a subset of patients did achieve sustained benefit but that this response was masked by heterogeneity in response to prednisolone therapy.

In contrast to CD4<sup>+</sup> T cell counts, HIV RNA levels were affected by prednisolone therapy. During the first month of prednisolone therapy, HIV RNA levels increased. This increase was transient and not associated with an increase in the incidence of HIV-associated conditions or mortality. The reasons for the increase in HIV RNA levels are speculative. HIV RNA levels were consistently higher in the prednisolone arm than in the placebo arm, across all levels of immune activation. This finding is consistent with the hypothesis that prednisolone therapy increases viral production, possibly through mechanisms involving glucocorticoid response elements in the genome of HIV [41]. It is also possible that the increase in HIV RNA levels resulted from lytic effects of high-dose prednisolone therapy on lymphocytes or from a complex mass-action effect between virus and CD4<sup>+</sup> cells [42]. Of note, HIV RNA levels were directly correlated with *M. tuberculosis*-induced levels of TNF- $\alpha$ , but only in the placebo arm. This later effect is consistent with the underlying hypothesis that TNF- $\alpha$  may stimulate HIV replication.

Prednisolone therapy was associated with a more rapid clearance of *M. tuberculosis* from the sputum, as has been reported

in patients with TB without HIV infection [43]. Although early clearance of organisms did not translate into reduced rates of treatment failure or disease recurrence, the present study was not designed to test this hypothesis. It is possible that, by reducing lung inflammation, prednisolone improved drug penetration into affected tissue, thereby accelerating the response to chemotherapy. Additional studies will be necessary to test this hypothesis.

As an immunoadjuvant treatment for TB, prednisolone therapy was associated with hypertension, fluid retention, and hyperglycemia. In most cases, adverse events were managed clinically, but, in 1 case, a patient with unrecognized hypertension developed accelerated hypertension after starting prednisolone therapy and died despite aggressive efforts to control blood pressure. There was no difference in short-term survival between the 2 treatment arms; the parity in survival implies that there was no excess mortality attributable to the intervention. Herpes viral infections (simplex and zoster combined) were seen more often in the prednisolone arm, but, unlike other investigators, we did not see an increase in cytomegalovirus infections [44], Kaposi sarcoma [45, 46, 39], *Pneumocystis carinii* pneumonia, candidiasis, or other major opportunistic infections, because most patients were not severely immunosuppressed during the intervention period.

In light of the findings of the present study, we conclude that, in patients with TB with CD4<sup>+</sup> T cell counts  $\geq 200$  cells/ $\mu$ L, short-term prednisolone therapy reduced levels of immune activation, tended to produce higher CD4<sup>+</sup> T cell counts, and caused a transient increase in HIV RNA levels during treatment. These findings did not support further investigation for clinical efficacy of prednisolone therapy in HIV-associated TB, as was reflected in the decision to curtail enrollment for a larger study of survival. Because of the risks of short-term prednisolone therapy and the failure to prolong survival in HIV-associated TB [39], there is little to recommend its use. The next logical target for immunoadjuvant treatment in HIV-associated TB is viral replication, an event downstream from the immune activation. As international efforts enhance access to antiretroviral therapy in Africa, the next step is to determine how best to treat HIV-associated TB with antiretroviral therapy.

## Acknowledgments

We would like to thank the staff of the Uganda National Tuberculosis and Leprosy Programme, the Uganda–Case Western Reserve University Research Collaboration TB Project Clinic, and the Uganda Tuberculosis Investigations Bacteriological Unit–Wandegeya for their invaluable assistance in the conduct of the study. We would especially like to acknowledge the contributions of Alice Namale, Michael Odie, Jessica Milman, Kevin Newel, and Lavenia Ferguson for their part in the conduct of the study. Hyun Yun and Wilma MacKay provided expert assistance in the analysis of the study.



## References

1. Dye C, Scheele S, Dolin P, Pathania V, Ravigliione MC. Consensus statement. Global burden of tuberculosis: estimated incidence, prevalence, and mortality by country. WHO Global Surveillance and Monitoring Project. *JAMA* **1999**; 282:677–86.
2. Brindle R, Nunn P, Githui W, Allen BW, Gathua S, Waiyaki PG. Quantitative bacillary response to treatment in HIV-associated pulmonary tuberculosis. *Am Rev Respir Dis* **1993**; 147:958–61.
3. Nunn P, Brindle R, Carpenter L, et al. Cohort study of human immunodeficiency virus infection in patients with tuberculosis in Nairobi, Kenya. *Am Rev Respir Dis* **1992**; 146:849–54.
4. Chaisson RE, Schecter GF, Theuer CP, Rutherford GW, Echenberg DF, Hopewell PC. Tuberculosis in patients with the acquired immunodeficiency syndrome: clinical features, response to therapy, and survival. *Am Rev Respir Dis* **1987**; 136:570–4.
5. Perriens JH, Colebunders RL, Karahunga C, et al. Increased mortality and tuberculosis treatment failure rate among human immunodeficiency virus seropositive compared to HIV seronegative patients with pulmonary tuberculosis treated with “standard” chemotherapy in Kinshasa, Zaire. *Am Rev Respir Dis* **1991**; 144:750–5.
6. Small PM, Schecter GF, Goodman PC, Sande MA, Chaisson RE, Hopewell PC. Treatment of tuberculosis in patients with advanced human immunodeficiency virus infection. *N Engl J Med* **1991**; 324:289–94.
7. Whalen CC, Okwera A, Johnson J, et al. Predictors of survival in human immunodeficiency virus-infected patients with pulmonary tuberculosis. *Am J Respir Crit Care Med* **1996**; 153:1977–81.
8. Whalen CC, Horsburgh CR, Hom D, Lahart C, Simberkoff M, Ellner J. Site of disease and opportunistic infection predict survival in HIV-associated tuberculosis. *AIDS* **1997**; 11:455–60.
9. Whalen C, Horsburgh CR, Hom D, Lahart C, Simberkoff M, Ellner J. Accelerated course of human immunodeficiency virus infection after tuberculosis. *Am J Respir Crit Care Med* **1995**; 151:129–35.
10. Munsiff SS, Alpert PL, Gourevitch MN, Chang CJ, Klein RS. A prospective study of tuberculosis and HIV disease progression. *J Acquir Immune Defic Syndr Hum Retrovirol* **1998**; 19:361–6.
11. Leroy V, Salmi LR, Dupon M, et al. Progression of human immunodeficiency virus in patients with tuberculosis disease. *Am J Epidemiol* **1997**; 145:293–300.
12. Tacconelli E, Tumbarello M, Ardito F, Cauda R. Tuberculosis significantly reduces the survival of patients with AIDS. *Int J Tuberc Lung Dis* **1997**; 1:582–3.
13. Whalen CC, Nsubuga P, Okwera A, et al. Impact of pulmonary tuberculosis on survival of HIV-infected adults: a prospective epidemiologic study in Uganda. *AIDS* **2000**; 14:1219–28.
14. Badri M, Ehrlich R, Wood R, Pulerwitz T, Maartens G. Association between tuberculosis and HIV disease progression in a high tuberculosis prevalence area. *Int J Tuberc Lung Dis* **2001**; 5:225–32.
15. Del Amo J, Malin AS, Pozniak AL, De Cock KM. Does tuberculosis accelerate the progression of HIV disease? Evidence from basic science and epidemiology. *AIDS* **1999**; 13:1151–8.
16. Toossi Z. Virological and immunological impact of tuberculosis on human immunodeficiency virus type 1 disease. *J Infect Dis* **2003**; 188: 1146–55.
17. Corey L. Reducing T cell activation as a therapy for human immunodeficiency virus infection. *J Infect Dis* **1995**; 171:521–2.
18. Wallis RS, Nsubuga P, Whalen C, et al. Pentoxifylline therapy in human immunodeficiency virus-seropositive persons with tuberculosis: a randomized, controlled trial. *J Infect Dis* **1996**; 174:727–33.
19. Klausner JD, Makonkawkeyoon S, Akarasevi P, et al. The effect of thalidomide on the pathogenesis of human immunodeficiency virus type 1 and *M. tuberculosis* infection. *J Acquir Immune Defic Syndr Hum Retrovirol* **1996**; 11:247–57.
20. Wallis RS, Kyambadde P, Johnson JL, et al. A study of the safety, immunology, virology, and microbiology of adjunctive etanercept in HIV-1-associated tuberculosis. *AIDS* **2004**; 18:257–64.
21. Andrieu JM, Lu W, Levey R. Sustained increases in CD4 cell counts in asymptomatic human immunodeficiency virus type-1-seropositive patients treated with prednisolone for one year. *J Infect Dis* **1995**; 171: 523–30.
22. Andrieu JM, Lu W. Long-term clinical, immunologic and virologic impact of glucocorticoids in the chronic phase of HIV infection. *BMC Med* **2004**; 2:17.
23. Auphan N, DiDonato JA, Rosette C, Helmsberg A, Karin M. Immunosuppression by glucocorticoids: inhibition of NF- $\kappa$ B activity through induction of I  $\kappa$ B synthesis. *Science* **1995**; 270:286–90.
24. Scheinman RI, Cogswell PC, Lofquist AK, Baldwin AS Jr. Role of transcriptional activation of I  $\kappa$ B alpha in mediation of immunosuppression by glucocorticoids. *Science* **1995**; 270:283–6.
25. McGowan JE, Chesney PJ, Crossly KB, LaForce FM. Guidelines for the use of systematic glucocorticosteroids in the management of selected infections. *J Infect Dis* **1992**; 165:1–13.
26. Centers for Disease Control and Prevention. Prevention and treatment of tuberculosis among patients infected with human immunodeficiency virus: principles of therapy and revised recommendations. *Morb Mortal Wkly Rep* **1998**; 47(RR-20):2–58.
27. Falk A, O'Connor JB, Pratt C. Classification of pulmonary tuberculosis: diagnostic standards and classification of tuberculosis. New York: National Tuberculosis and Respiratory Disease Association, **1969**:68–76.
28. Kaplan E, Meier P. Nonparametric estimation from incomplete observations. *JASA* **1958**; 53:457–81.
29. Peto R, Pike MC, Armitage P, et al. Design and analysis of randomized clinical trials requiring prolonged observation of each patient. II. Analysis and examples. *Br J Cancer* **1977**; 35:1–39.
30. Laird NM, Ware JH. Random-effect models for longitudinal data. *Biometrics* **1982**; 38:963–74.
31. Toossi Z. Virological and immunological impact of tuberculosis on human immunodeficiency virus type 1 disease. *J Infect Dis* **2003**; 188: 1146–55.
32. Bean AG, Roach DR, Briscoe H, et al. Structural deficiencies in granuloma formation in TNF gene-targeted mice underlie the heightened susceptibility to aerosol *Mycobacterium tuberculosis* infection. *J Immunol* **1999**; 162:3504–11.
33. Keane J, Gershon S, Wise RP, et al. Tuberculosis associated with infliximab, a tumor necrosis factor  $\alpha$ -neutralizing agent. *N Engl J Med* **2001**; 345:1098–104.
34. Flynn JL, Goldstein MM, Chan J, Triebold KJ, Pfeffer K, Lowenstein CJ. Tumor necrosis factor- $\alpha$  is required in the protective immune response against *Mycobacterium tuberculosis* in mice. *Immunity* **1995**; 2: 561–72.
35. Wallis RS, Vjecha M, Amir-Tahmassebi M, et al. Influence of tuberculosis on human immunodeficiency virus (HIV-1); enhanced cytokine expression and elevated  $\beta_2$ -microglobulin in HIV-1-associated tuberculosis. *J Infect Dis* **1993**; 167:43–8.
36. Kindler V, Syepino AP, Gran GE, et al. The inducing role of tumor necrosis factor in the development of bactericidal granulomas during BCG infection. *Cell* **1989**; 56:731–40.
37. Osborn L, Kunkel S, Nabel GJ. Tumor necrosis factor- $\alpha$  and interleukin 1 stimulate the human immunodeficiency virus enhancer by activation of the nuclear factor kappa B. *Proc Natl Acad Sci* **1989**; 86:2336–40.
38. Poli G, Kinter A, Justement JS, et al. Tumor necrosis factor  $\alpha$  functions in an autocrine manner in the induction of human immunodeficiency virus expression. *Proc Natl Acad Sci USA* **1990**; 87:782–5.
39. Elliott AM, Luzze H, Quigley MA, et al. A randomized, double-blind, placebo-controlled trial of the use of prednisolone as an adjunct to treatment in HIV-1-associated pleural tuberculosis. *J Infect Dis* **2004**; 190:869–78.
40. Wallis RS, Kalayjian R, Jacobson JM, et al. A study of the immunology, virology, and safety of prednisone in HIV-1-infected subjects with CD4 cell counts of 200 to 700 mm<sup>-3</sup>. *J Acquir Immune Defic Syndr* **2003**; 32: 281–6.
41. Soudeyns H, Geleziunas R, Shyamala G, Hiscott J, Wainberg MA. Identification of a novel glucocorticoid response element within the genome of the human immunodeficiency virus type 1. *Virology* **1993**; 194:758–68.

42. Kirschner D. Dynamics of co-infection with *M. tuberculosis* and HIV-1. *Theor Popul Biol* **1999**; 55:94–109.
43. Horne NW. Prednisone in the treatment of pulmonary tuberculosis: a controlled trial, final report to the research committee of the Tuberculosis Society of Scotland. *BMJ* **1960**; 5215:1751–56.
44. Nelson MR, Erskine D, Hawkins DA, Gazzard BC. Treatment with corticosteroids—a risk factor for the development of clinical cytomegalovirus disease in AIDS. *AIDS* **1993**; 7:375–8.
45. Gill PS, Loureiro C, Bernstein-Singer M, Rarick MU, Sattler F, Levine AM. Clinical effect of glucocorticoids on Kaposi sarcoma related to the acquired immunodeficiency syndrome (AIDS). *Ann Intern Med* **1989**; 110:937–40.
46. Gallant JE, Chaisson RE, Moore RD. The effect of adjunctive corticosteroids for the treatment of *Pneumocystis carinii* pneumonia on mortality and subsequent complications. *Chest* **1998**; 114:1258–63.
